# Supplementary material for: Molecular evolution of protein-RNA mimicry as a mechanism for translational control
Source: PubMed Central journal article supplement — Nucleic Acids Res. 2013 Dec 13;42(5):3261–71. doi: 10.1093/nar/gkt1296 (PMC3950694; doi:10.1093/nar/gkt1296), 2013-12-13

## Supplementary Information

### **Molecular Evolution of Protein-RNA Mimicry as a Mechanism for Translational Control**

Assaf Katz<sup>a</sup>, Lindsey Solden<sup>a</sup>, S.Betty Zou<sup>b</sup>, Will Navarre<sup>b</sup> and Michael Ibba<sup>a,c</sup>

<sup>a</sup>Department of Microbiology, Ohio State University, Columbus, OH 43210, USA

<sup>b</sup>Department of Molecular Genetics, University of Toronto, Toronto, ON, Canada M5S 1A8

<sup>c</sup>Ohio State Biochemistry Program, Center for RNA Biology, Ohio State University, Columbus, OH 43210, USA

\*Corresponding author: Michael Ibba  
Department of Microbiology  
The Ohio State University  
318 West 12<sup>th</sup> Avenue  
Columbus, OH 43210-1292  
USA  
  
Tel: +1 (614) 292-2120  
E-mail: [ibba.1@osu.edu](mailto:ibba.1@osu.edu)

Table S1. Primers used for *poxA* mutagenesis.

| Name             | Sequence <sup>a</sup>                         | Position mutated to alanine |
|------------------|-----------------------------------------------|-----------------------------|
| mut_His52Ala_fd  | GCGACGGTAACCGATATTgcTTTGGTCCCGTTTGAGACAC      | His52                       |
| mut_His52Ala_rv  | GTGTCTCAAACGGGACCAAAGcAATATCGGTTACCGTCGC      | His52                       |
| mut_Glu102Ala_fd | CGCAGCTTCCGTAATGcAGAGATGGGGCGTTATC            | Glu102                      |
| mut_Glu102Ala_rv | GATAACGCCCCATCTCTgCATTACGGAAGCTGCG            | Glu102                      |
| mut_Glu103Ala_fd | CAGCTTCCGTAATGAAGcGATGGGGCGTTATCAC            | Glu103                      |
| mut_Glu103Ala_rv | GTGATAACGCCCCATCgCTTCATTACGGAAGCTG            | Glu103                      |
| mut_Arg106Ala_fd | CCGTAATGAAGAGATGGGGgcTTATCACAACCCTGAGTTCAC    | Arg106                      |
| mut_Arg106Ala_rv | GTGAACTCAGGGTTGTGATAAgcCCCCATCTCTTCATTACGG    | Arg106                      |
| mut_His108Ala_fd | GAAGAGATGGGGCGTTATgCAACCCTGAGTTCACATATGC      | Hist108                     |
| mut_His108Ala_rv | GCATAGTGAACCTCAGGGTTGgcATAACGCCCCATCTCTTC     | Hist108                     |
| mut_Asp177Ala_fd | GTCGCAGCGAAACTGGcTTTGAGCAATGTTGCTG            | Asp177                      |
| mut_Asp177Ala_rv | CAGCAACATTGCTCAAAGcCCAGTTTCGCTGCGAC           | Asp177                      |
| mut_Asn180Ala_fd | CAGCGAAACTGGATTTGAGCgcTGTTGCTGATACCGAAGAAG    | Asn180                      |
| mut_Asn180Ala_rv | CTTCTTCGGTATCAGCAACAgcGCTCAAATCCAGTTTCGCTG    | Aspn180                     |
| mut_Glu185Ala_fd | CAATGTTGCTGATACCGcAGAAGACCGCGACACG            | Glu185                      |
| mut_Glu185Ala_rv | CGTGTCGCGGTCTTCTgCGGTATCAGCAACATTG            | Glu185                      |
| mut_Gln193Ala_fd | GACCGCGACACGCTGCTAgcATTGCTGTTTACCTTTGGC       | Gln193                      |
| mut_Gln193Ala_rv | GCCAAAGGTAAACAGCAATgcTAGCAGCGTGTCGCGGTC       | Gln193                      |
| mut_Ser218Ala_fd | GTACCACTTCCAGCCgcCCAGGCATCACTGGCG             | Ser218                      |
| mut_Ser218Ala_rv | CGCCAGTGATGCCTGGgcGGCTGGAAAGTGGTAC            | Ser218                      |
| mut_Arg235Ala_fd | CGAAGATCATCGGGTCGCTGAAgcCTTTGAGGTTTATTATAAAGG | Arg235                      |
| mut_Arg235Ala_rv | CCTTTATAATAAACCTCAAAGgcTTCAGCGACCCGATGATCTTCG | Arg235                      |
| mut_Glu244Ala_fd | GGTTTATTATAAAGGTATTGcGCTGGCGAATGGTTTCCATG     | Glu244                      |
| mut_Glu244Ala_rv | CATGGAAACCATTGCGCAGCgCAATACCTTTATAATAAACC     | Glu244                      |
| mut_Arg303Ala_fd | GTGGCATTAGGTGTTGATgcTCTGGTGATGTTGGCGCTG       | Arg303                      |
| mut_Arg303Ala_rv | CAGCGCCAACATCACCAGAgcATCAACACCTAATGCCAC       | Arg303                      |

<sup>a</sup> Mutation site is marked in lower case.

Table S2. Primers used for EF-P mutagenesis.

| Name            | Sequence <sup>a</sup>                  | Position mutated to alanine |
|-----------------|----------------------------------------|-----------------------------|
| mut_Phe29Ala_rv | CCTTTACCCGGTTTTACGGCTTCACTCGCTTCAACCGG | Phenylalanine 29            |
| mut_Phe29Ala_fd | CCGGTTGAAGCGAGTGAAGCCGTAAAACCGGGTAAAGG | Phenylalanine 29            |
| mut_Lys31Ala_rv | CCTGGCCTTTACCCGGTGCTACGAATTCCTCGCTTC   | Lysine 31                   |
| mut_Lys31Ala_fd | GAAGCGAGTGAATTCGTAGCACCCGGGTAAAGGCCAGG | Lysine 31                   |
| mut_Gly33Ala_rv | GCAATGCCTGGCCTTTAGCCGGTTTTACGAATTCAC   | Glycine 33                  |
| mut_Gly33Ala_fd | GTGAATTCGTAAAACCGGCTAAAGGCCAGGCATTTGC  | Glycine 33                  |

<sup>a</sup> Mutation site is marked in lower case.

Table S3. Species with *poxA* used for alignments.

|                                           | TaxID  | Species name                       | Protein GI |
|-------------------------------------------|--------|------------------------------------|------------|
| <b><math>\gamma</math> proteobacteria</b> |        |                                    |            |
|                                           | 386585 | <i>Escherichia coli</i>            | 15834382   |
|                                           | 62977  | <i>Acinetobacter sp.</i>           | 50085316   |
|                                           | 243277 | <i>Vibrio cholerae</i>             | 15642655   |
|                                           | 190485 | <i>Xanthomonas campestris</i>      | 21231710   |
|                                           | 272843 | <i>Pasteurella multocida</i>       | 15601965   |
|                                           | 177416 | <i>Francisella tularensis</i>      | 56707386   |
|                                           | 297246 | <i>Legionella pneumophila</i>      | 54296336   |
| <b><math>\delta</math> proteobacteria</b> |        |                                    |            |
|                                           | 246197 | <i>Myxococcus xanthus</i>          | 108762276  |
|                                           | 443143 | <i>Geobacter sp.</i>               | 322419666  |
|                                           | 448385 | <i>Sorangium cellulosum</i>        | 162457520  |
| <b><math>\alpha</math> proteobacteria</b> |        |                                    |            |
|                                           | 634452 | <i>Acetobacter Pasteurianus</i>    | 258542853  |
|                                           | 342108 | <i>Magnetospirillum_magneticum</i> | 83310384   |
| <b>Spirochaetales</b>                     |        |                                    |            |
|                                           | 243276 | <i>Treponema pallidum</i>          | 15639515   |
|                                           | 189518 | <i>Leptospira interrogans</i>      | 24217355   |

Table S4. Species without *poxA* used for alignments.

|                         | TaxID  | Species name                          | Protein GI |
|-------------------------|--------|---------------------------------------|------------|
| <b>γ proteobacteria</b> | 380394 | <i>Acidithiobacillus ferrooxidans</i> | 198283109  |
| <b>δ proteobacteria</b> | 882    | <i>Desulfovibrio vulgaris</i>         | 46580076   |
|                         | 644282 | <i>Desulfarculus baarsii_DSM_2075</i> | 302343635  |
| <b>ε proteobacteria</b> | 85962  | <i>Helicobacter pilory</i>            | 15644806   |
|                         | 195099 | <i>Campylobacter jejuni</i>           | 57238249   |
|                         | 387092 | <i>Nitratiruptor sp.</i>              | 152990419  |
| <b>α proteobacteria</b> | 315456 | <i>Rickettsia felis</i>               | 67459441   |
|                         | 262698 | <i>Brucella abortus</i>               | 62290582   |
| <b>Firmicutes</b>       | 169963 | <i>Listeria monocytogenes</i>         | 16803395   |
|                         | 170187 | <i>Streptococcus pneumoniae</i>       | 15900353   |
|                         | 413999 | <i>Clostridium botulinum</i>          | 148379858  |
| <b>Actinobacteria</b>   | 83332  | <i>Mycobacterium tuberculosis</i>     | 15609671   |
|                         | 525909 | <i>Acidimicrobium ferrooxidans</i>    | 256372478  |
| <b>Bacteroidetes</b>    | 402612 | <i>Flavobacterium psychrophilum</i>   | 150025056  |
|                         | 295405 | <i>Bacteroides fragilis</i>           | 53711777   |
| <b>Cyanobacteria</b>    | 103690 | <i>Nostoc sp.</i>                     | 17232550   |
|                         | 269084 | <i>Synechococcus elongatus</i>        | 56751554   |

**Fig S1. Contacts between EF-P and PoxA.** **A)** EF-P contacts both PoxA subunits of the dimer. Figure shows the complex of 2 PoxA (in green and magenta) and 2 EF-P (in blue and red) as observed in pdb 3a5z (chains A, B, C and D). Arrows indicate area where EF-P contacts the other PoxA of the complex. **B) and C)** Amino acids involved in contacts between EF-P and PoxA. Figure shows amino acids on EF-P (B) and PoxA (C) that make either polar or non-polar contacts. Coloring of figure B and C is as in Figure 1. Additional non-polar contacts are highlighted in blue while non-polar contacts to the other subunit of the complex are marked in cyan.

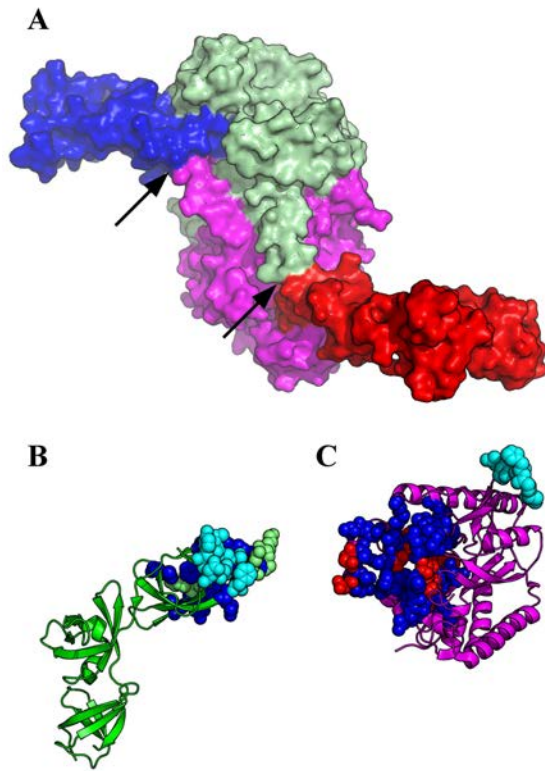

**Fig S2. Superposition of EFP/PoxA complex with tRNA<sup>Asp</sup>/AspRS complex.** Structures of EFP/PoxA (pdb 3a5z chains C and D) and tRNA/AspRS (pdb 1asy chains A and R) were superposed guided by PoxA and AspRS structures. PoxA is shown in magenta and EF-P in green while AspRS is in blue and tRNA<sup>Asp</sup> in orange.

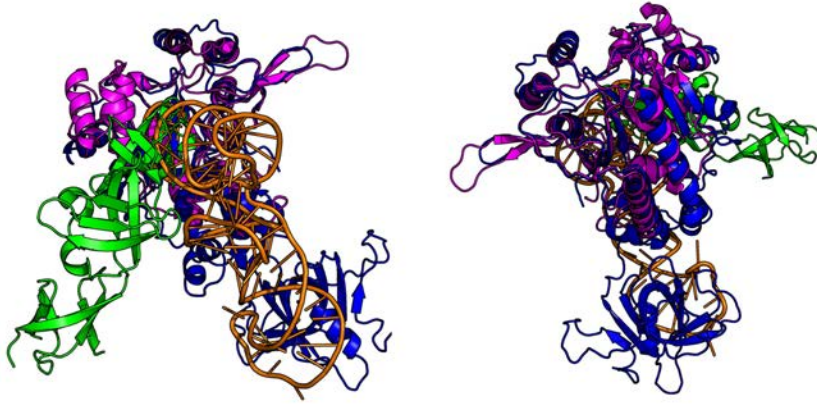

**Fig S3. Analysis of EF-P aminoacylation.** After EF-P aminoacylation, the sample was separated by isoelectric focusing (inset). Aminoacylated EF-P (K-EF-P) migrated lower in the gel due to the additional positive charge, which allowed quantification and analysis.

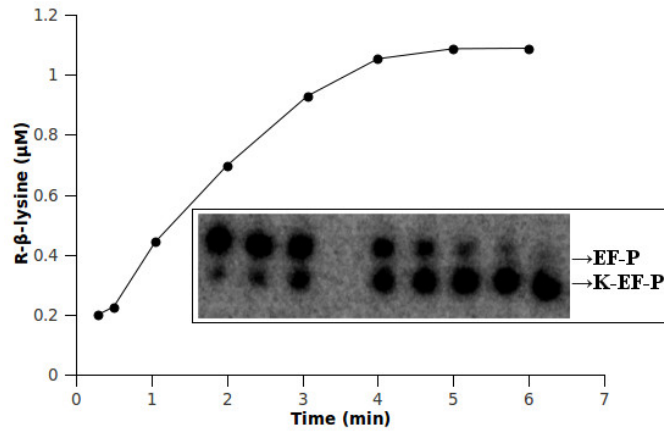





**Fig S5. EF-P contacts with PoxA and the ribosome.** WebLogo representation of the alignment of 112 EF-P sequences. Residues that interact with PoxA in pdb 3a5z are marked with red triangles while those that interact with the ribosome or tRNA<sup>Met</sup> in pdb files 3huw or 3hux are marked with light blue triangles. The acceptor loop is marked with a black line, with a black triangle highlighting the aminoacylation position.

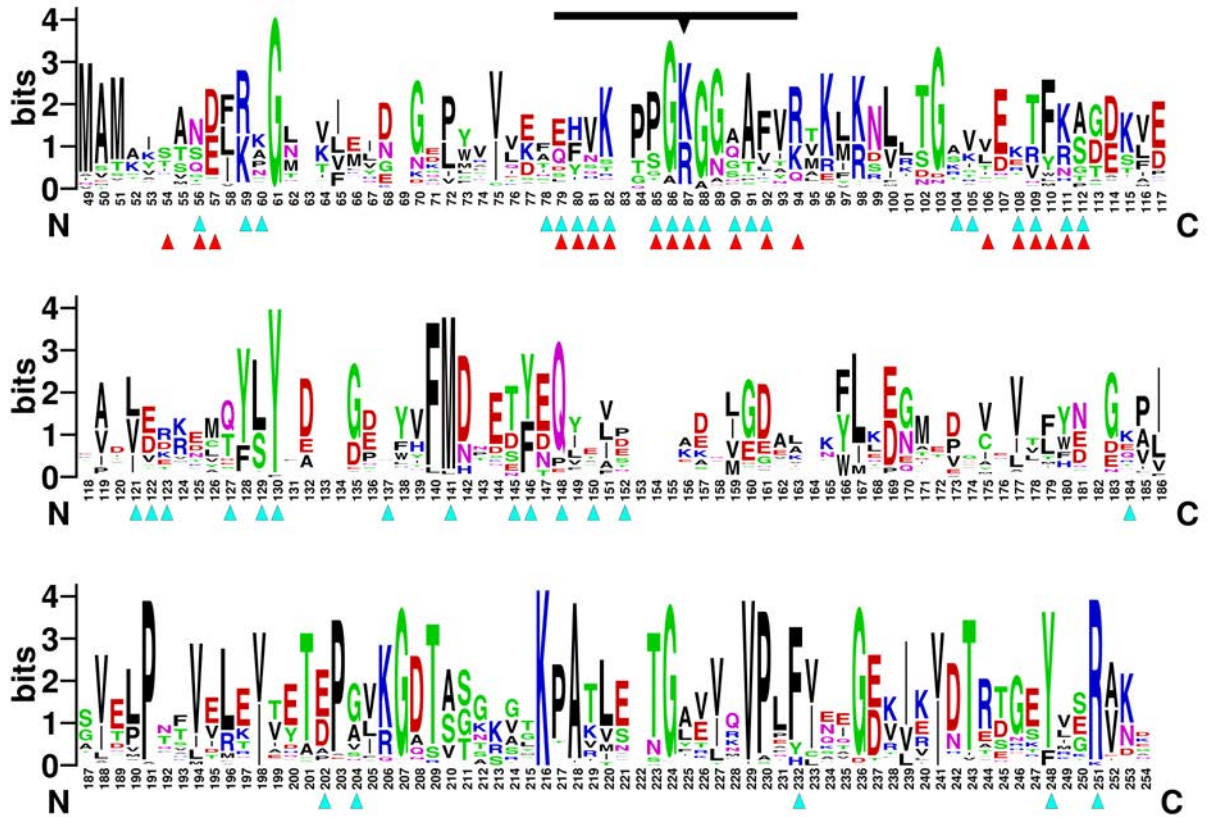

Supplement: supp_gkt1296_nar-03139-r-2013-File008.pdf [file supp_gkt1296_nar-03139-r-2013-File008.pdf]
